# Supplementary material
Source: PubMed Central journal article supplement (PMC3648006)
Supplement: IAI.01414-12_zii999090095so2.pdf [file IAI.01414-12_zii999090095so2.pdf]

Key AA sites

| Pro domain |    |    | Domain I |    |    |    |    |    |    |    |    |    |    |     |     |     |     |     |     |     |     |     |     |     |     |     |     |     |     |     |     |     |     |     |     | Domain II |     |     |     |     |     |     |     |     |     |     |     |     |     |     |     |     |     |     |     |     |     |     |     |     |     |     |     |     |     |     |     |     | Domain III |     |     |     |     |     |  |  |  |  |  |  |  |  |  |  |  |  |  |  |  |  |  |  |  |  |  |  |  |  |  |  |  |
|------------|----|----|----------|----|----|----|----|----|----|----|----|----|----|-----|-----|-----|-----|-----|-----|-----|-----|-----|-----|-----|-----|-----|-----|-----|-----|-----|-----|-----|-----|-----|-----|-----------|-----|-----|-----|-----|-----|-----|-----|-----|-----|-----|-----|-----|-----|-----|-----|-----|-----|-----|-----|-----|-----|-----|-----|-----|-----|-----|-----|-----|-----|-----|-----|-----|------------|-----|-----|-----|-----|-----|--|--|--|--|--|--|--|--|--|--|--|--|--|--|--|--|--|--|--|--|--|--|--|--|--|--|--|
| Strain #   | 30 | 34 | 36       | 39 | 45 | 48 | 50 | 52 | 54 | 58 | 60 | 72 | 76 | 106 | 121 | 130 | 144 | 162 | 167 | 172 | 173 | 174 | 175 | 187 | 189 | 190 | 196 | 197 | 199 | 200 | 201 | 204 | 206 | 207 | 210 | 224       | 225 | 228 | 230 | 242 | 243 | 244 | 245 | 267 | 269 | 282 | 283 | 285 | 286 | 296 | 300 | 308 | 325 | 328 | 330 | 332 | 374 | 393 | 395 | 404 | 405 | 407 | 435 | 439 | 448 | 451 | 485 | 493 | 496        | 498 | 505 | 512 | 526 | 544 |  |  |  |  |  |  |  |  |  |  |  |  |  |  |  |  |  |  |  |  |  |  |  |  |  |  |  |
| Strain 1   | H  | N  | D        | R  | R  | P  | E  | P  | E  | D  | Y  | A  | M  | E   | D   | L   | N   | T   | Q   | N   | G   | V   | E   | L   | M   | D   | L   | R   | H   | F   | D   | K   | Y   | N   | M   | I         | N   | K   | D   | K   | D   | K   | E   | K   | I   | S   | Q   | N   | D   | K   | Q   | H   | E   | P   | L   | M   | H   | K   | T   | E   | Q   | I   | N   | D   | M   | K   | D   | M   | S          | R   | F   | R   | E   | K   |  |  |  |  |  |  |  |  |  |  |  |  |  |  |  |  |  |  |  |  |  |  |  |  |  |  |  |
| Strain 2   | H  | N  | D        | R  | R  | P  | E  | P  | E  | D  | Y  | A  | M  | E   | D   | L   | N   | T   | Q   | N   | G   | V   | E   | L   | M   | D   | L   | R   | H   | F   | D   | K   | Y   | N   | M   | I         | N   | K   | D   | K   | D   | K   | E   | K   | I   | S   | Q   | N   | D   | K   | Q   | H   | E   | P   | L   | M   | H   | K   | T   | E   | Q   | I   | N   | D   | M   | K   | D   | M   | S          | R   | F   | R   | E   | K   |  |  |  |  |  |  |  |  |  |  |  |  |  |  |  |  |  |  |  |  |  |  |  |  |  |  |  |
| Strain 3   | H  | N  | D        | R  | R  | P  | E  | P  | E  | D  | Y  | A  | M  | E   | D   | L   | N   | T   | Q   | N   | G   | V   | E   | L   | M   | D   | L   | R   | H   | F   | D   | K   | Y   | N   | M   | I         | N   | K   | D   | K   | D   | K   | E   | K   | I   | S   | Q   | N   | D   | K   | Q   | H   | E   | P   | L   | M   | H   | K   | T   | E   | Q   | I   | N   | D   | M   | K   | D   | M   | S          | R   | F   | R   | E   | K   |  |  |  |  |  |  |  |  |  |  |  |  |  |  |  |  |  |  |  |  |  |  |  |  |  |  |  |
| Strain 4   | H  | N  | D        | R  | R  | P  | E  | P  | E  | D  | Y  | A  | M  | E   | D   | L   | N   | T   | Q   | N   | G   | V   | E   | L   | M   | D   | L   | R   | H   | F   | D   | K   | Y   | N   | M   | I         | N   | K   | D   | K   | D   | K   | E   | K   | I   | S   | Q   | N   | D   | K   | Q   | H   | E   | P   | L   | M   | H   | K   | T   | E   | Q   | I   | N   | D   | M   | K   | D   | M   | S          | R   | F   | R   | E   | K   |  |  |  |  |  |  |  |  |  |  |  |  |  |  |  |  |  |  |  |  |  |  |  |  |  |  |  |
| Strain 5   | H  | N  | D        | R  | R  | P  | E  | P  | E  | D  | Y  | A  | M  | E   | D   | L   | N   | T   | Q   | N   | G   | V   | E   | L   | M   | D   | L   | R   | H   | F   | D   | K   | Y   | N   | M   | I         | N   | K   | D   | K   | D   | K   | E   | K   | I   | S   | Q   | N   | D   | K   | Q   | H   | E   | P   | L   | M   | H   | K   | T   | E   | Q   | I   | N   | D   | M   | K   | D   | M   | S          | R   | F   | R   | E   | K   |  |  |  |  |  |  |  |  |  |  |  |  |  |  |  |  |  |  |  |  |  |  |  |  |  |  |  |
| Strain 6   | H  | N  | D        | R  | R  | P  | E  | P  | E  | D  | Y  | A  | M  | E   | D   | L   | N   | T   | Q   | N   | G   | V   | E   | L   | M   | D   | L   | R   | H   | F   | D   | K   | Y   | N   | M   | I         | N   | K   | D   | K   | D   | K   | E   | K   | I   | S   | Q   | N   | D   | K   | Q   | H   | E   | P   | L   | M   | H   | K   | T   | E   | Q   | I   | N   | D   | M   | K   | D   | M   | S          | R   | F   | R   | E   | K   |  |  |  |  |  |  |  |  |  |  |  |  |  |  |  |  |  |  |  |  |  |  |  |  |  |  |  |
| Strain 7   | H  | N  | D        | R  | R  | P  | E  | P  | E  | D  | Y  | A  | M  | E   | D   | L   | N   | T   | Q   | N   | G   | V   | E   | L   | M   | D   | L   | R   | H   | F   | D   | K   | Y   | N   | M   | I         | N   | K   | D   | K   | D   | K   | E   | K   | I   | S   | Q   | N   | D   | K   | Q   | H   | E   | P   | L   | M   | H   | K   | T   | E   | Q   | I   | N   | D   | M   | K   | D   | M   | S          | R   | F   | R   | E   | K   |  |  |  |  |  |  |  |  |  |  |  |  |  |  |  |  |  |  |  |  |  |  |  |  |  |  |  |
| Strain 8   | H  | N  | D        | R  | R  | P  | E  | P  | E  | D  | Y  | A  | M  | E   | D   | L   | N   | T   | Q   | N   | G   | V   | E   | L   | M   | D   | L   | R   | H   | F   | D   | K   | Y   | N   | M   | I         | N   | K   | D   | K   | D   | K   | E   | K   | I   | S   | Q   | N   | D   | K   | Q   | H   | E   | P   | L   | M   | H   | K   | T   | E   | Q   | I   | N   | D   | M   | K   | D   | M   | S          | R   | F   | R   | E   | K   |  |  |  |  |  |  |  |  |  |  |  |  |  |  |  |  |  |  |  |  |  |  |  |  |  |  |  |
| Strain 9   | H  | N  | D        | R  | R  | P  | E  | P  | E  | D  | Y  | A  | M  | E   | D   | L   | N   | T   | Q   | N   | G   | V   | E   | L   | M   | D   | L   | R   | H   | F   | D   | K   | Y   | N   | M   | I         | N   | K   | D   | K   | D   | K   | E   | K   | I   | S   | Q   | N   | D   | K   | Q   | H   | E   | P   | L   | M   | H   | K   | T   | E   | Q   | I   | N   | D   | M   | K   | D   | M   | S          | R   | F   | R   | E   | K   |  |  |  |  |  |  |  |  |  |  |  |  |  |  |  |  |  |  |  |  |  |  |  |  |  |  |  |
| Strain 10  | H  | N  | D        | R  | R  | P  | E  | P  | E  | D  | Y  | A  | M  | E   | D   | L   | N   | T   | Q   | N   | G   | V   | E   | L   | M   | D   | L   | R   | H   | F   | D   | K   | Y   | N   | M   | I         | N   | K   | D   | K   | D   | K   | E   | K   | I   | S   | Q   | N   | D   | K   | Q   | H   | E   | P   | L   | M   | H   | K   | T   | E   | Q   | I   | N   | D   | M   | K   | D   | M   | S          | R   | F   | R   | E   | K   |  |  |  |  |  |  |  |  |  |  |  |  |  |  |  |  |  |  |  |  |  |  |  |  |  |  |  |
| Strain 11  | H  | N  | D        | R  | R  | P  | E  | P  | E  | D  | Y  | A  | M  | E   | D   | L   | N   | T   | Q   | N   | G   | V   | E   | L   | M   | D   | L   | R   | H   | F   | D   | K   | Y   | N   | M   | I         | N   | K   | D   | K   | D   | K   | E   | K   | I   | S   | Q   | N   | D   | K   | Q   | H   | E   | P   | L   | M   | H   | K   | T   | E   | Q   | I   | N   | D   | M   | K   | D   | M   | S          | R   | F   | R   | E   | K   |  |  |  |  |  |  |  |  |  |  |  |  |  |  |  |  |  |  |  |  |  |  |  |  |  |  |  |
| Strain 12  | H  | N  | D        | R  | R  | P  | E  | P  | E  | D  | Y  | A  | M  | E   | D   | L   | N   | T   | Q   | N   | G   | V   | E   | L   | M   | D   | L   | R   | H   | F   | D   | K   | Y   | N   | M   | I         | N   | K   | D   | K   | D   | K   | E   | K   | I   | S   | Q   | N   | D   | K   | Q   | H   | E   | P   | L   | M   | H   | K   | T   | E   | Q   | I   | N   | D   | M   | K   | D   | M   | S          | R   | F   | R   | E   | K   |  |  |  |  |  |  |  |  |  |  |  |  |  |  |  |  |  |  |  |  |  |  |  |  |  |  |  |
| Strain 13  | H  | N  | D        | R  | R  | P  | E  | P  | E  | D  | Y  | A  | M  | E   | D   | L   | N   | T   | Q   | N   | G   | V   | E   | L   | M   | D   | L   | R   | H   | F   | D   | K   | Y   | N   | M   | I         | N   | K   | D   | K   | D   | K   | E   | K   | I   | S   | Q   | N   | D   | K   | Q   | H   | E   | P   | L   | M   | H   | K   | T   | E   | Q   | I   | N   | D   | M   | K   | D   | M   | S          | R   | F   | R   | E   | K   |  |  |  |  |  |  |  |  |  |  |  |  |  |  |  |  |  |  |  |  |  |  |  |  |  |  |  |
| Strain 14  | H  | N  | D        | R  | R  | P  | E  | P  | E  | D  | Y  | A  | M  | E   | D   | L   | N   | T   | Q   | N   | G   | V   | E   | L   | M   | D   | L   | R   | H   | F   | D   | K   | Y   | N   | M   | I         | N   | K   | D   | K   | D   | K   | E   | K   | I   | S   | Q   | N   | D   | K   | Q   | H   | E   | P   | L   | M   | H   | K   | T   | E   | Q   | I   | N   | D   | M   | K   | D   | M   | S          | R   | F   | R   | E   | K   |  |  |  |  |  |  |  |  |  |  |  |  |  |  |  |  |  |  |  |  |  |  |  |  |  |  |  |
| Strain 15  | H  | N  | D        | R  | R  | P  | E  | P  | E  | D  | Y  | A  | M  | E   | D   | L   | N   | T   | Q   | N   | G   | V   | E   | L   | M   | D   | L   | R   | H   | F   | D   | K   | Y   | N   | M   | I         | N   | K   | D   | K   | D   | K   | E   | K   | I   | S   | Q   | N   | D   | K   | Q   | H   | E   | P   | L   | M   | H   | K   | T   | E   | Q   | I   | N   | D   | M   | K   | D   | M   | S          | R   | F   | R   | E   | K   |  |  |  |  |  |  |  |  |  |  |  |  |  |  |  |  |  |  |  |  |  |  |  |  |  |  |  |
| Strain 16  | H  | N  | D        | R  | R  | P  | E  | P  | E  | D  | Y  | A  | M  | E   | D   | L   | N   | T   | Q   | N   | G   | V   | E   | L   | M   | D   | L   | R   | H   | F   | D   | K   | Y   | N   | M   | I         | N   | K   | D   | K   | D   | K   | E   | K   | I   | S   | Q   | N   | D   | K   | Q   | H   | E   | P   | L   | M   | H   | K   | T   | E   | Q   | I   | N   | D   | M   | K   | D   | M   | S          | R   | F   | R   | E   | K   |  |  |  |  |  |  |  |  |  |  |  |  |  |  |  |  |  |  |  |  |  |  |  |  |  |  |  |
| Strain 17  | H  | N  | D        | R  | R  | P  | E  | P  | E  | D  | Y  | A  | M  | E   | D   | L   | N   | T   | Q   | N   | G   | V   | E   | L   | M   | D   | L   | R   | H   | F   | D   | K   | Y   | N   | M   | I         | N   | K   | D   | K   | D   | K   | E   | K   | I   | S   | Q   | N   | D   | K   | Q   | H   | E   | P   | L   | M   | H   | K   | T   | E   | Q   | I   | N   | D   | M   | K   | D   | M   | S          | R   | F   | R   | E   | K   |  |  |  |  |  |  |  |  |  |  |  |  |  |  |  |  |  |  |  |  |  |  |  |  |  |  |  |
| Strain 18  | H  | N  | D        | R  | R  | P  | E  | P  | E  | D  | Y  | A  | M  | E   | D   | L   | N   | T   | Q   | N   | G   | V   | E   | L   | M   | D   | L   | R   | H   | F   | D   | K   | Y   | N   | M   | I         | N   | K   | D   | K   | D   | K   | E   | K   | I   | S   | Q   | N   | D   | K   | Q   | H   | E   | P   | L   | M   | H   | K   | T   | E   | Q   | I   | N   | D   | M   | K   | D   | M   | S          | R   | F   | R   | E   | K   |  |  |  |  |  |  |  |  |  |  |  |  |  |  |  |  |  |  |  |  |  |  |  |  |  |  |  |
| Strain 19  | H  | N  | D        | R  | R  | P  | E  | P  | E  | D  | Y  | A  | M  | E   | D   | L   | N   | T   | Q   | N   | G   | V   | E   | L   | M   | D   | L   | R   | H   | F   | D   | K   | Y   | N   | M   | I         | N   | K   | D   | K   | D   | K   | E   | K   | I   | S   | Q   | N   | D   | K   | Q   | H   | E   | P   | L   | M   | H   | K   | T   | E   | Q   | I   | N   | D   | M   | K   | D   | M   | S          | R   | F   | R   | E   | K   |  |  |  |  |  |  |  |  |  |  |  |  |  |  |  |  |  |  |  |  |  |  |  |  |  |  |  |
| Strain 20  | H  | N  | D        | R  | R  | P  | E  | P  | E  | D  | Y  | A  | M  | E   | D   | L   | N   | T   | Q   | N   | G   | V   | E   | L   | M   | D   | L   | R   | H   | F   | D   | K   | Y   | N   | M   | I         | N   | K   | D   | K   | D   | K   | E   | K   | I   | S   | Q   | N   | D   | K   | Q   | H   | E   | P   | L   | M   | H   | K   | T   | E   | Q   | I   | N   | D   | M   | K   | D   | M   | S          | R   | F   | R   | E   | K   |  |  |  |  |  |  |  |  |  |  |  |  |  |  |  |  |  |  |  |  |  |  |  |  |  |  |  |
| Strain 21  | H  | N  | D        | R  | R  | P  | E  | P  | E  | D  | Y  | A  | M  | E   | D   | L   | N   | T   | Q   | N   | G   | V   | E   | L   | M   | D   | L   | R   | H   | F   | D   | K   | Y   | N   | M   | I         | N   | K   | D   | K   | D   | K   | E   | K   | I   | S   | Q   | N   | D   | K   | Q   | H   | E   | P   | L   | M   | H   | K   | T   | E   | Q   | I   | N   | D   | M   | K   | D   | M   | S          | R   | F   | R   | E   | K   |  |  |  |  |  |  |  |  |  |  |  |  |  |  |  |  |  |  |  |  |  |  |  |  |  |  |  |
| Strain 22  | H  | N  | D        | R  | R  | P  | E  | P  | E  | D  | Y  | A  | M  | E   | D   | L   | N   | T   | Q   | N   | G   | V   | E   | L   | M   | D   | L   | R   | H   | F   | D   | K   | Y   | N   | M   | I         | N   | K   | D   | K   | D   | K   | E   | K   | I   | S   | Q   | N   | D   | K   | Q   | H   | E   | P   | L   | M   | H   | K   | T   | E   | Q   | I   | N   | D   | M   | K   | D   | M   | S          | R   | F   | R   | E   | K   |  |  |  |  |  |  |  |  |  |  |  |  |  |  |  |  |  |  |  |  |  |  |  |  |  |  |  |
| Strain 23  | H  | N  | D        | R  | R  | P  | E  | P  | E  | D  | Y  | A  | M  | E   | D   | L   | N   | T   | Q   | N   | G   | V   | E   | L   | M   | D   | L   | R   | H   | F   | D   | K   | Y   | N   | M   | I         | N   | K   | D   | K   | D   | K   | E   | K   | I   | S   | Q   | N   | D   | K   | Q   | H   | E   | P   | L   | M   | H   | K   | T   | E   | Q   | I   | N   | D   | M   | K   | D   | M   | S          | R   | F   | R   | E   | K   |  |  |  |  |  |  |  |  |  |  |  |  |  |  |  |  |  |  |  |  |  |  |  |  |  |  |  |
| Strain 24  | H  | N  | D        | R  | R  | P  | E  | P  | E  | D  | Y  | A  | M  | E   | D   | L   | N   | T   | Q   | N   | G   | V   | E   | L   | M   | D   | L   | R   | H   | F   | D   | K   | Y   | N   | M   | I         | N   | K   | D   | K   | D   | K   | E   | K   | I   | S   | Q   | N   | D   | K   | Q   | H   | E   | P   | L   | M   | H   | K   | T   | E   | Q   | I   | N   | D   | M   | K   | D   | M   | S          | R   | F   | R   | E   | K   |  |  |  |  |  |  |  |  |  |  |  |  |  |  |  |  |  |  |  |  |  |  |  |  |  |  |  |
| Strain 25  | H  | N  | D        | R  | R  | P  | E  | P  | E  | D  | Y  | A  | M  | E   | D   | L   | N   | T   | Q   | N   | G   | V   | E   | L   | M   | D   | L   | R   | H   | F   | D   | K   | Y   | N   | M   | I         | N   | K   | D   | K   | D   | K   | E   | K   | I   | S   | Q   | N   | D   | K   | Q   | H   | E   | P   | L   | M   | H   | K   | T   | E   | Q   | I   | N   | D   | M   | K   | D   | M   | S          | R   | F   | R   | E   | K   |  |  |  |  |  |  |  |  |  |  |  |  |  |  |  |  |  |  |  |  |  |  |  |  |  |  |  |
| Strain 26  | H  | N  | D        | R  | R  | P  | E  | P  | E  | D  | Y  | A  | M  | E   | D   | L   | N   | T   | Q   | N   | G   | V   | E   | L   | M   | D   | L   | R   | H   | F   | D   | K   | Y   | N   | M   | I         | N   | K   | D   | K   | D   | K   | E   | K   | I   | S   | Q   | N   | D   | K   | Q   | H   | E   | P   | L   | M   | H   | K   | T   | E   | Q   | I   | N   | D   | M   | K   | D   | M   | S          | R   | F   | R   | E   | K   |  |  |  |  |  |  |  |  |  |  |  |  |  |  |  |  |  |  |  |  |  |  |  |  |  |  |  |
| Strain 27  | H  | N  | D        | R  | R  | P  | E  | P  | E  | D  | Y  | A  | M  | E   | D   | L   | N   | T   | Q   | N   | G   | V   | E   | L   | M   | D   | L   | R   | H   | F   | D   | K   | Y   | N   | M   | I         | N   | K   | D   | K   | D   | K   | E   | K   | I   | S   | Q   | N   | D   | K   | Q   | H   | E   | P   | L   | M   | H   | K   | T   | E   | Q   | I   | N   | D   | M   | K   | D   | M   | S          | R   | F   | R   | E   | K   |  |  |  |  |  |  |  |  |  |  |  |  |  |  |  |  |  |  |  |  |  |  |  |  |  |  |  |
| Strain 28  | H  | N  | D        | R  | R  | P  | E  | P  | E  | D  | Y  | A  | M  | E   | D   | L   | N   | T   | Q   | N   | G   | V   | E   | L   | M   | D   | L   | R   | H   | F   | D   | K   | Y   | N   | M   | I         | N   | K   | D   | K   | D   | K   | E   | K   | I   | S   | Q   | N   | D   | K   | Q   | H   | E   | P   | L   | M   | H   | K   | T   | E   | Q   | I   | N   | D   | M   | K   | D   | M   | S          | R   | F   | R   | E   | K   |  |  |  |  |  |  |  |  |  |  |  |  |  |  |  |  |  |  |  |  |  |  |  |  |  |  |  |
| Strain 29  | H  | N  | D        | R  | R  | P  | E  | P  | E  | D  | Y  | A  | M  | E   | D   | L   | N   | T   | Q   | N   | G   | V   | E   | L   | M   | D   | L   | R   | H   | F   | D   | K   | Y   | N   | M   | I         | N   | K   | D   | K   | D   | K   | E   | K   | I   | S   | Q   | N   | D   | K   | Q   | H   | E   | P   | L   | M   | H   | K   | T   | E   | Q   | I   | N   | D   | M   | K   | D   | M   | S          | R   | F   | R   | E   | K   |  |  |  |  |  |  |  |  |  |  |  |  |  |  |  |  |  |  |  |  |  |  |  |  |  |  |  |
| Strain 30  | H  | N  | D        | R  | R  | P  | E  | P  | E  | D  | Y  | A  | M  | E   | D   | L   | N   | T   | Q   | N   | G   | V   | E   | L   | M   | D   | L   | R   | H   | F   | D   | K   | Y   | N   | M   | I         | N   | K   | D   | K   | D   | K   | E   | K   | I   | S   | Q   | N   | D   | K   | Q   | H   | E   | P   | L   | M   | H   | K   | T   | E   | Q   | I   | N   | D   | M   | K   | D   | M   | S          | R   | F   | R   | E   | K   |  |  |  |  |  |  |  |  |  |  |  |  |  |  |  |  |  |  |  |  |  |  |  |  |  |  |  |
| Strain 31  | H  | N  | D        | R  | R  | P  | E  | P  |    |    |    |    |    |     |     |     |     |     |     |     |     |     |     |     |     |     |     |     |     |     |     |     |     |     |     |           |     |     |     |     |     |     |     |     |     |     |     |     |     |     |     |     |     |     |     |     |     |     |     |     |     |     |     |     |     |     |     |     |            |     |     |     |     |     |  |  |  |  |  |  |  |  |  |  |  |  |  |  |  |  |  |  |  |  |  |  |  |  |  |  |  |
